# Supplementary material
Source: PubMed Central journal article supplement (PMC6622410)
Supplement: ASN.2018080860SupplementaryData.pdf [file ASN.2018080860SupplementaryData.pdf]

# Supplementary Figures

Figure 1

## Supplementary Table of Contents

|                      |                                                                                                              |          |
|----------------------|--------------------------------------------------------------------------------------------------------------|----------|
| Suppl. Figure 1 A-H  | CD2AP is tyrosine phosphorylated in response to VEGF-A stimulation                                           | Page 1-3 |
| Suppl. Figure 2 A    | Absence of tyrosine 10 does not effect binding of proteins to the proline rich or coild-coil region of CD2AP | Page 4   |
| Suppl. Figure legend |                                                                                                              | Page 5   |

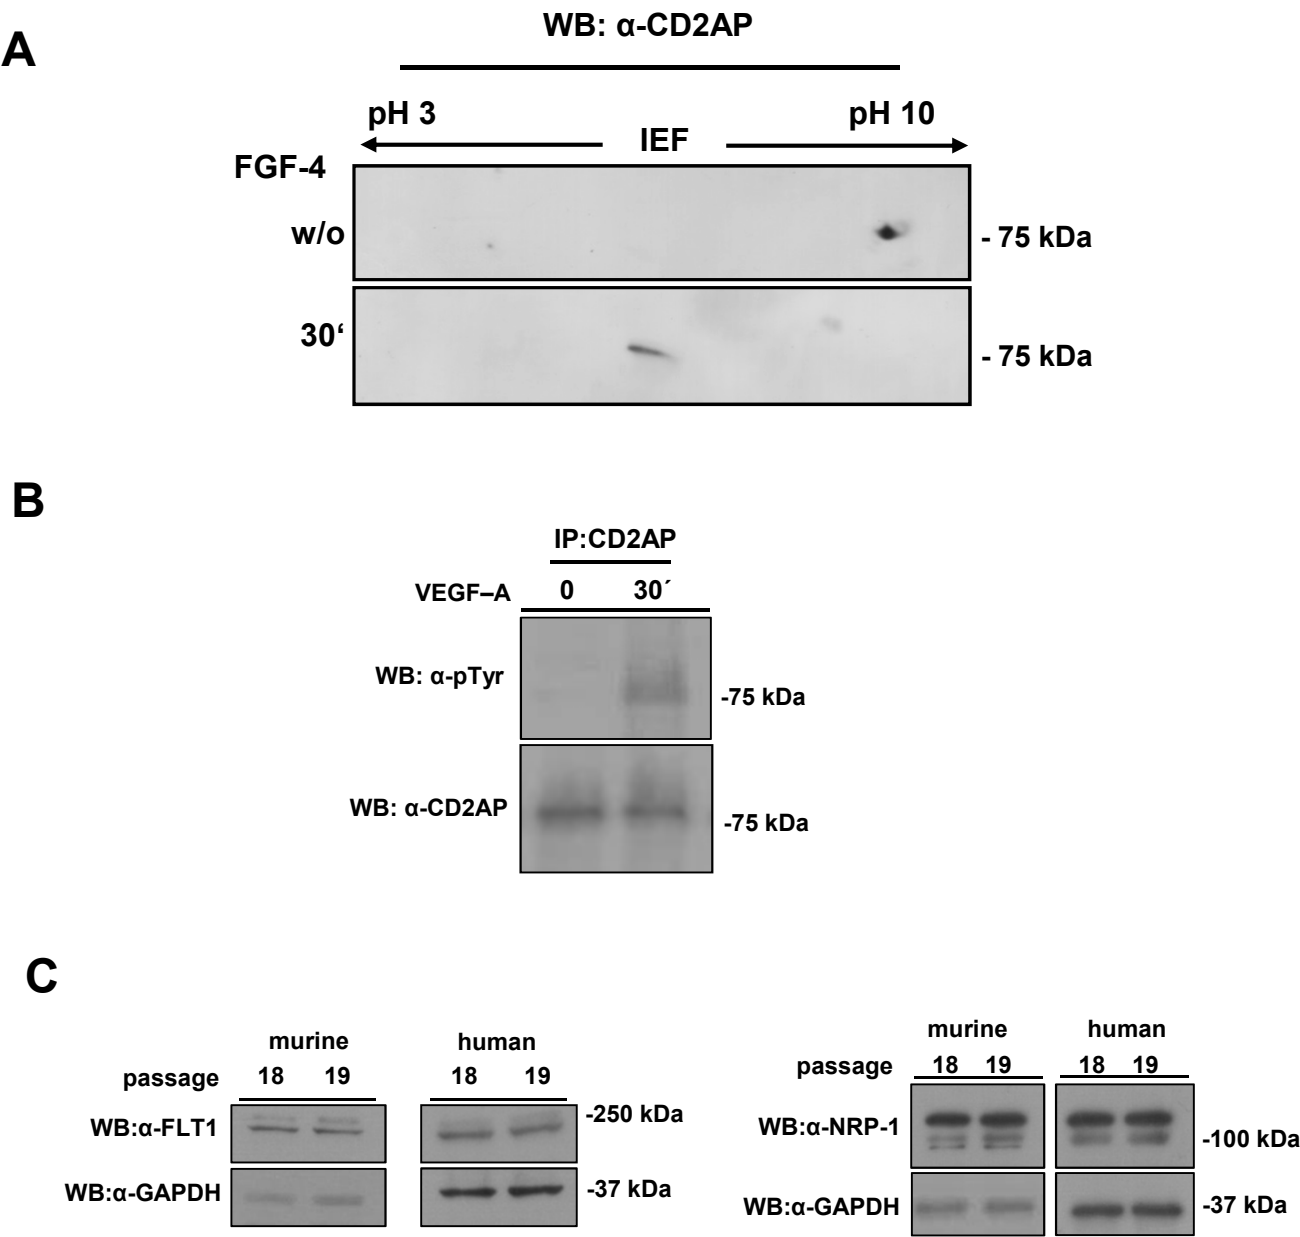

**D**

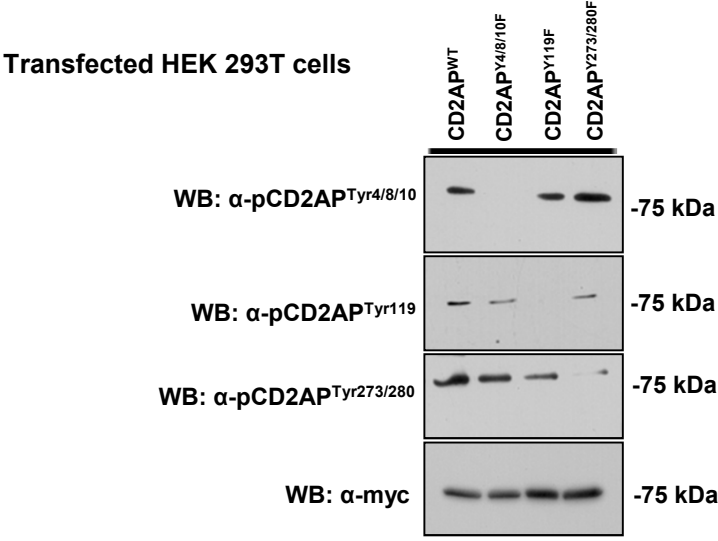

**E**

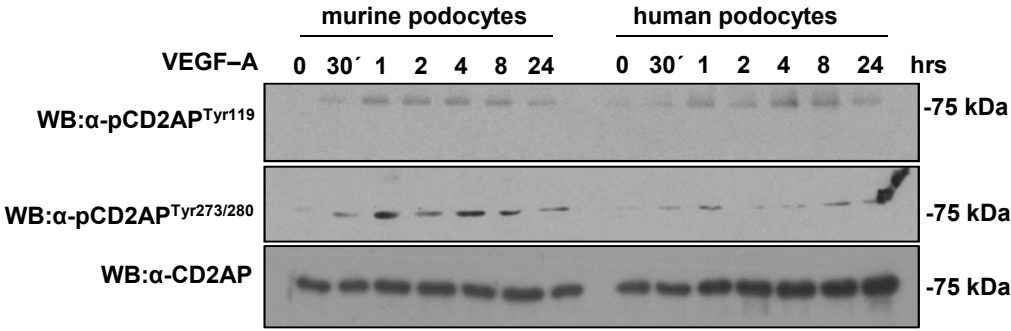

**F**

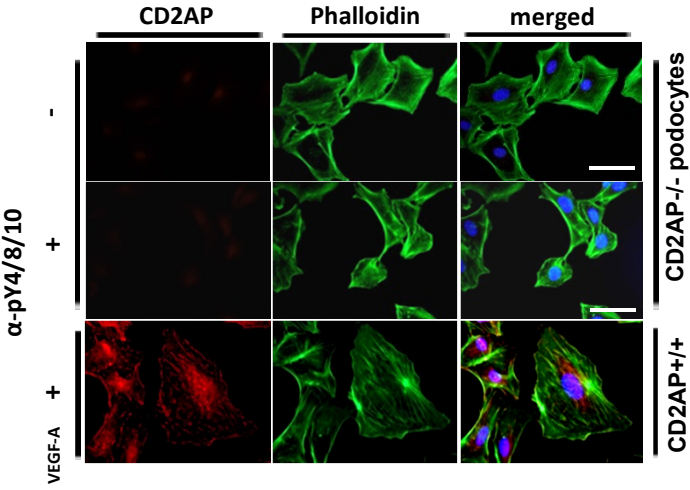

**G**

**CD2AP-peptides**

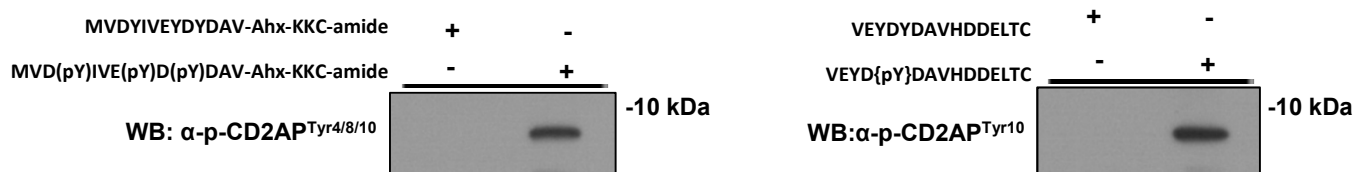

**H**

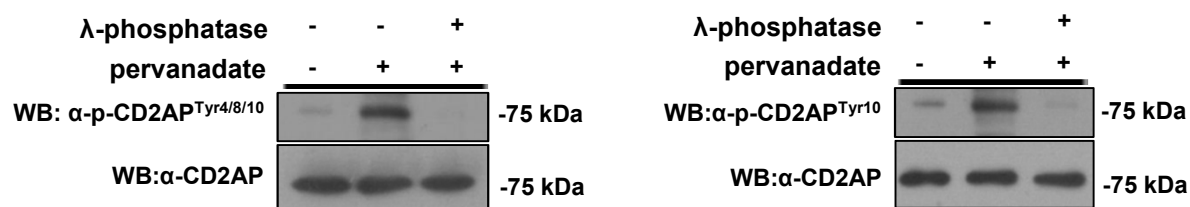

Figure 2

A

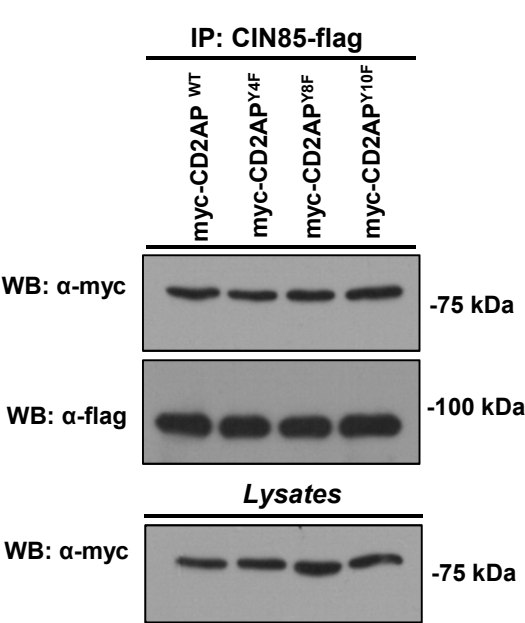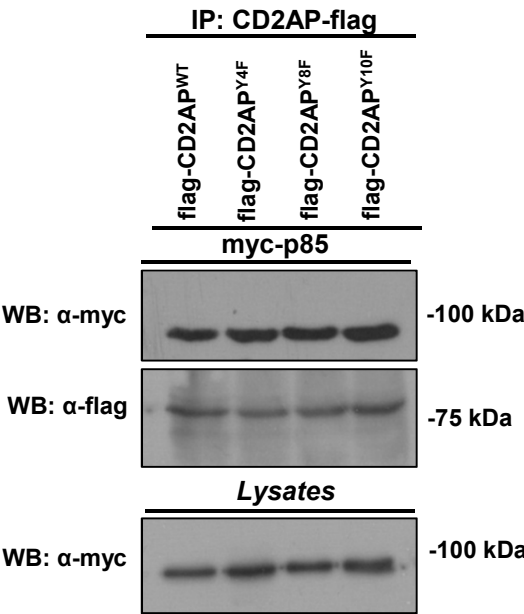

## Supplementary Figure legend

### Supplementary Figure 1

*CD2AP is tyrosine phosphorylated in response to VEGF-A stimulation.* (A) 2D isoelectrical electrophoresis using an anti-CD2AP antibody shows a shift of CD2AP after treatment with FGF-4 after 30 minutes. *Expression of the VEGFR1 and Neuropilin-1 in cultured murine and human podocytes.* (B) Differentiated murine podocytes were treated or untreated with 20 ng/ml VEGF-A for 30 minutes. Lysates were immunoprecipitated with a CD2AP-antibody and western blot was performed with a phosphotyrosine-antibody. CD2AP was used as loading control. (C) Lysates of differentiated murine and human podocytes from two different passages were analyzed by western blot using an FLT-1 and Neuropilin-1 antibody. GAPDH was used as loading control. Specificity of generated phosphor-CD2AP antibodies. (D) Myc-tagged CD2AP DNA was point mutated on indicated tyrosine sites. HEK 293T cells were transfected with CD2AP and CD2AP tyrosine-mutants. Western blot was performed with the appropriate p-CD2AP antibody. Myc was used as loading control. (E) Differentiated murine and human podocytes were treated with 20 ng/ml VEGF-A for up to 24 hours. Western blot analysis of lysates was performed using a p-CD2AP<sup>tyr119</sup> or p-CD2AP<sup>tyr273/280</sup> antibody. CD2AP was used as loading control. (F) Differentiated murine CD2AP<sup>+/+</sup> and CD2AP<sup>-/-</sup> podocytes untreated or treated with VEGF-A were stained with the p-CD2AP<sup>tyr4/8/10</sup> antibody (red) and co-stained with Phalloidin (green) and DAPI (blue). Scale bars 30  $\mu$ m. (G) Non- and phosphorylated peptides of CD2AP were analyzed by western blot. Appropriate p-CD2AP antibody shows only a signal with the phosphorylated peptides. (H) Differentiated murine podocytes were untreated or treated with pervanadate (10 mM) for 30 minutes. Treatment of the lysates with  $\lambda$ -phosphatase leads to dephosphorylation of CD2AP.

### Supplementary Figure 2

*Absence of tyrosine 10 does not effect binding of proteins to the proline rich or coiled-coil region of CD2AP* (A) Myc and flag-tagged CD2AP DNA was point mutated on indicated tyrosine sites. HEK 293T cells transfected with CD2AP- and CIN85- or p85-DNA were lysed and immunoprecipitated with a flag-antibody. Western blot was analyzed with a myc- and flag-antibody.
